# Supplementary material for: The impact of preoperative treatment on mismatch repair protein and HER2 expression in colorectal cancer: an analysis of paired samples
Source: PubMed Central journal article supplement — BMC Cancer. 2024 Nov 15;24:1407. doi: 10.1186/s12885-024-13120-w (PMC11566055; doi:10.1186/s12885-024-13120-w), 2024-11-15
Supplement: 12885_2024_13120_MOESM1_ESM.pdf [file 12885_2024_13120_MOESM1_ESM.pdf]

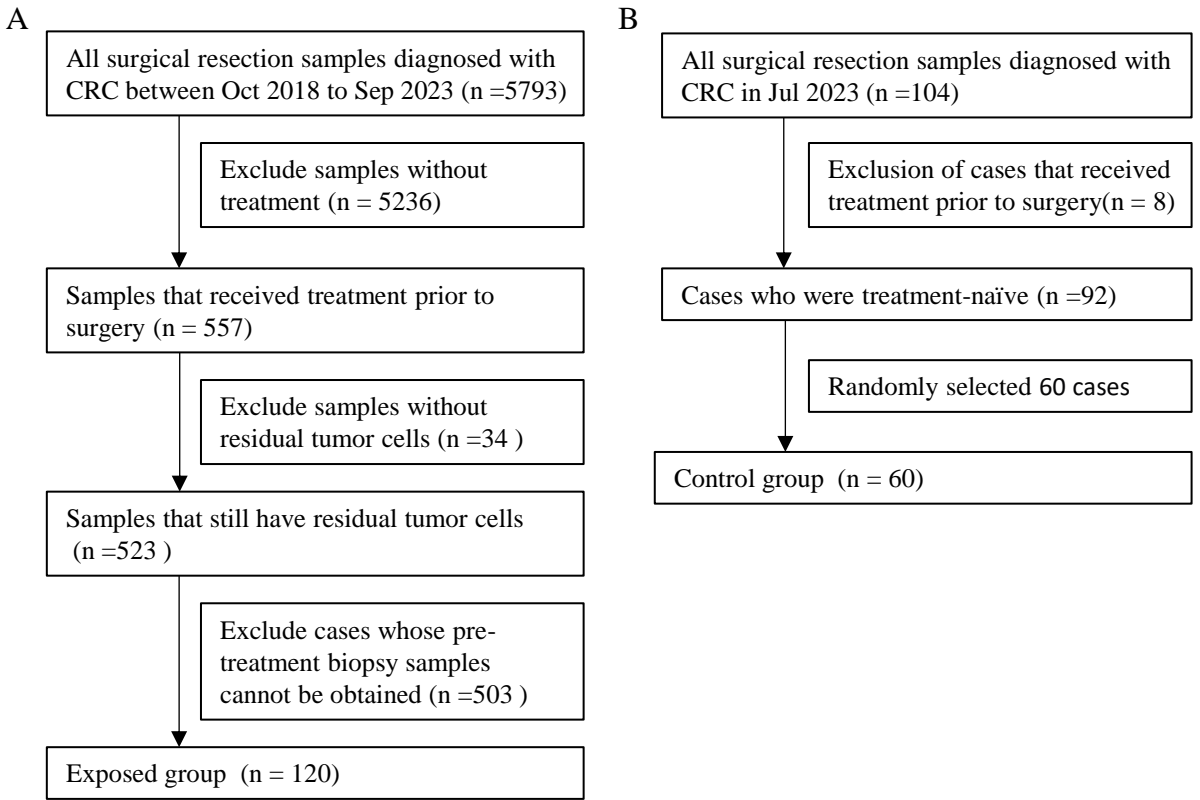

Figure S1. Study sample selection flowchart. The process of participant selection for the study, delineating the path to inclusion in exposed group (A) and control group (B).

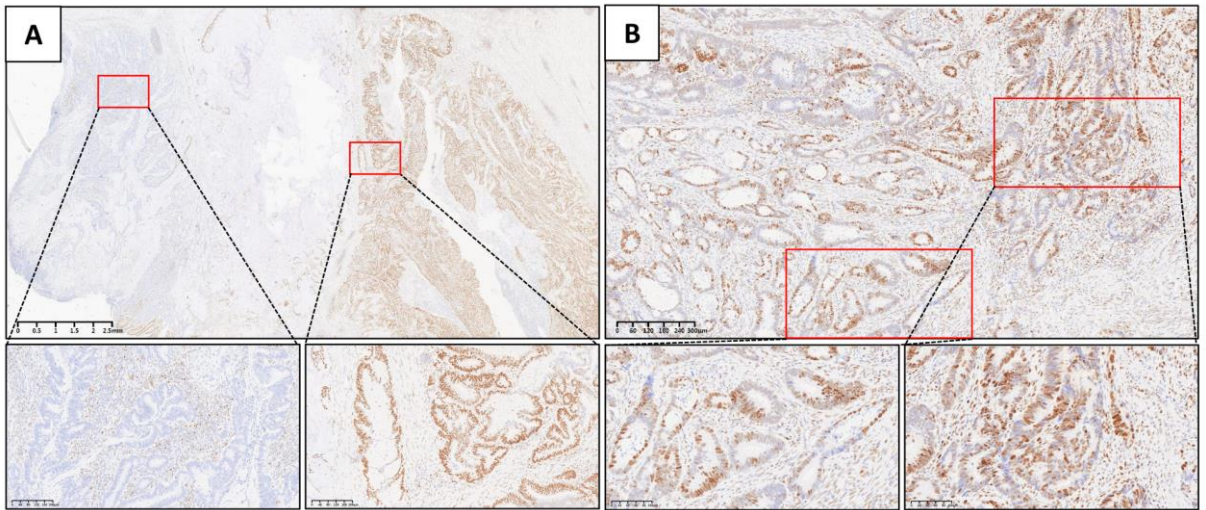

Figure S2. Heterogeneity in MSH6 expression. (A) Representative case demonstrating intra-tumoral heterogeneity of MSH6 expression in different regions of the same tumor. (B) Representative case showing cellular-level heterogeneity of MSH6 expression within the same glandular structure.
